# Supplementary material for: A systematic analysis of splicing variants identifies new diagnoses in the 100,000 Genomes Project
Source: bioRxiv or medRxiv preprint supplement (doi:10.1101/2022.01.28.22270002), 2022-01-31

Tier

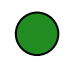

1

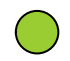

3

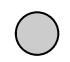

Not tiered

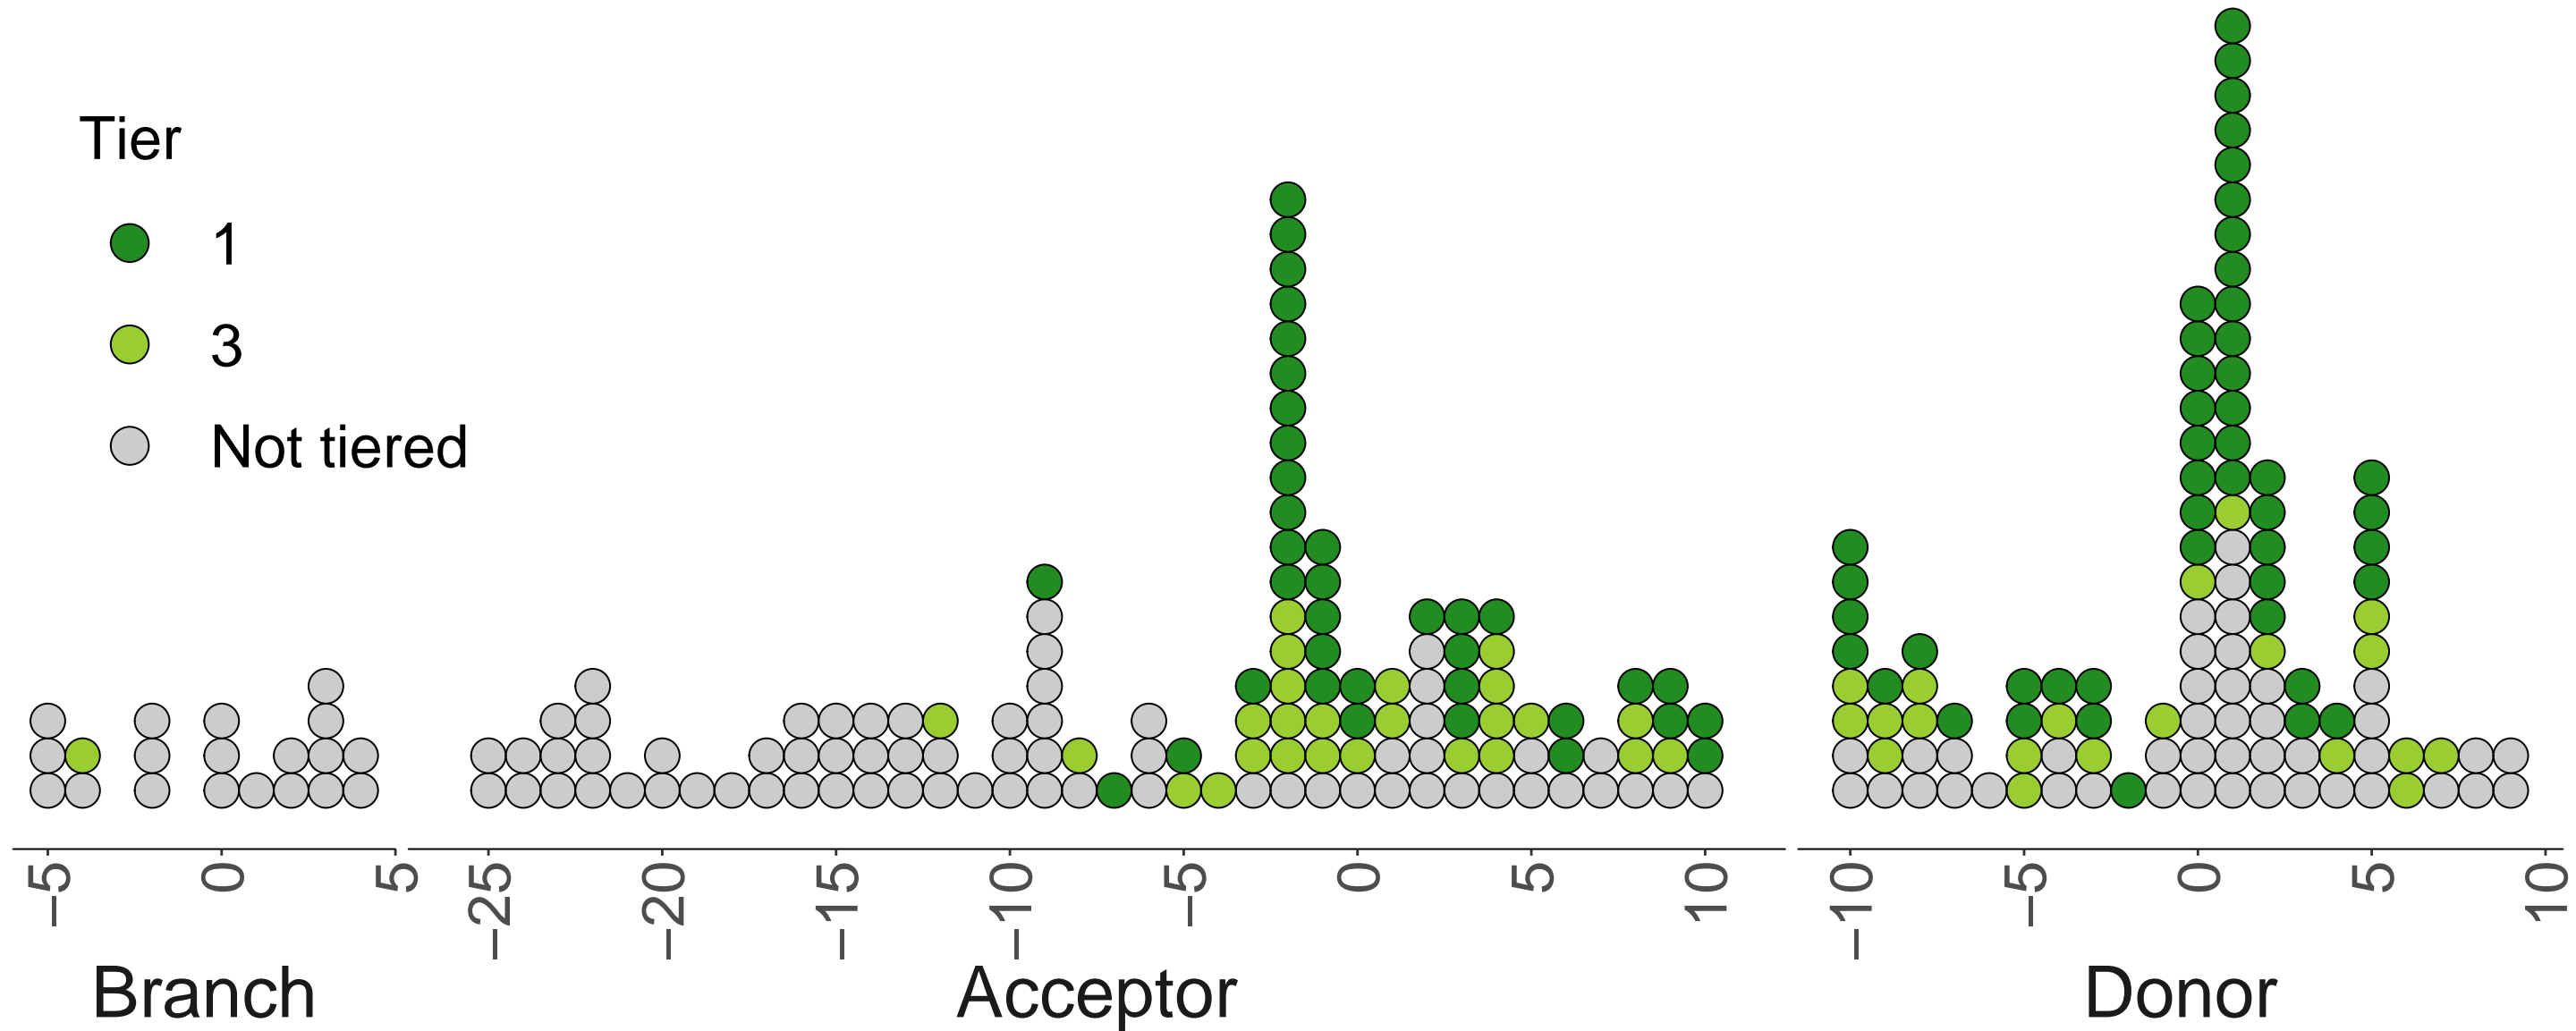

Supplement: Supplementary file [file media-1.pdf]
